# Supplementary material for: A spatially resolved timeline of the human maternal–fetal interface
Source: PubMed Central journal article supplement (PMC10356615; doi:10.1038/s41586-023-06298-9), 2023-07-19
Supplement: 41586_2023_6298_MOESM1_ESM.pdf [file 41586_2023_6298_MOESM1_ESM.pdf]

**Supplementary information**

---

**A spatially resolved timeline of the human maternal–fetal interface**

---

In the format provided by the authors and unedited

# Supplementary Information

Contains Supplemental Tables Guide and Supplemental Methods regarding antibody validation, cell segmentation and phenotyping, decidual ROIs Nanostring data analysis and immunoregulatory marker expression. Including 4 Supplementary Information Figures titled:

- 1. MIBI-TOF antibody panel
- 2. Workflow for Mesmer whole-cell segmentation of single cells from MIBI images and cell phenotyping
- 3. Decidual ROIs Nanostring data analysis
- 4. Single-cell expression of immunoregulatory markers

## Table of Contents

- Supplementary Tables Guide ..... 2**
- Supplementary Methods ..... 5**
  - Antibody Validation..... 5**
  - Cell Segmentation and Clustering ..... 6**
  - Analysis of NanoString Whole Transcriptome Data for Decidua ROIs .....15**
  - Tim-3 and Galectin-9 Co-expression in single cells .....17**

## Supplementary Tables Guide

**Supplementary Table 1 - Patients and block histology.** First tab- Patient meta-data such as age, ethnicity, body mass index, parity and relevant medical conditions such as HIV. Second tab- Information on the histological characteristics of the blocks retrieved, including the presence of cell column anchoring villi. Per patient's block, indication whether cell column anchoring villi were present (1) or absent (0), and the number of regions containing spiral arteries annotated as appropriate for TMA construction by the pathologist (Methods). In blocks containing  $\geq 2$  distinct, separate pieces of tissue, cell column villi were considered present if they were present on any piece containing pathologist annotations.

**Supplementary Table 2 - Artery properties and staging.** First tab- Arteries meta-data, including their measured digitized morphological features (see Methods), manual stage and remodeling score  $\delta$ . Second tab- LDA coefficients for artery morphological features. Per feature LDA coefficients (ld1,ld2) and their Z scored absolute values.

**Supplementary Table 3 – Cell-artery and cell-cell spatial enrichment.** First tab- Linear regression results of cell types enrichment around arteries as function of remodeling score  $\delta$ . Rows: cell types. Columns: regression  $R^2$ , p-value, maximal absolute value of enrichment and trend size (see Methods). Second tab - temporal trends in cell-cell enrichment. Rows: combinations of 2 cell types in the format: cell type a- cell type b. The information in the row is for the enrichment of cell type a around cell type b. The columns show values for the linear regression on per image basis of enrichment scores as function of GA and remodeling score  $\delta$ :  $R^2$ , the maximal obtained regression  $R^2$ , p-value, maximal enrichment (absolute value) and trend size (see Methods). Third tab- constant in time cell-cell enrichment.

**Supplementary Table 4 – NanoString DSP analysis of artery ROIs.** First tab- Synchronized expression of GO-BP pathways. See Methods for details about p-value calculation. Second tab- Per gene second degree polynomial regression results:  $R^2$ , p-values and fold change of gene expression as function of GA and  $\delta$ .

**Supplementary Table 5 – NicheNet analysis.** First tab- Comprehensive list of all NicheNet predicted target genes in artery (see Methods) with function classification and references for classification. Second tab- Genes Of Interest (GOI) list : SAR trending genes in artery. Third tab: genes expressed in receiver cells – all genes expressed in artery. Fourth tab- genes in sender cells: DEG between intravascular and interstitial EVT's, higher in intravascular. See methods.

**Supplementary Table 6 – PE indicated genes.** Genes differentially expressed in decidua samples from women diagnosed with preeclampsia. List taken from PMID: 28618048.

**Supplementary Table 7 - Antibodies.** First tab- MIBI antibodies: metal reporters, staining concentrations, and parameters used for low-level processing of MIBI images.

Per marker antibody information, including: clone, vendor, vendor ID, channel and elemental reporter, and final staining titers used. The parameters used for marker-specific low-level processing of MIBI data (background removal, denoising, and aggregate removal steps as previously described) are also shown. Second tab- Nanostring morphology markers information. Per marker antibody information including clone, channel and final staining titers used.

**Supplementary Table 8 – Number of segmented events per image.** Number of single cells per image, after segmentation, post processing and exclusion of small non-cellular objects. See Methods.

**Supplementary Table 9 - Positivity binary threshold for functional markers.** Binary expression thresholds per functional marker- used to determine whether cells are positive for that marker (See methods).

**Supplementary Table 10 – Figure 3 and Figure 5 volcano plots.** First tab- Values plotted in Fig. 3n. Each row represents a cell proportion with those starting with R\_ indication proportion out of all cells in the image, I\_ - proportion out of immune cells in image, N\_ - proportion out of NK cells in image, M\_ proportion out of macrophages in image, T\_ - proportion out of T cells in image, F\_ - proportion out of EVT in image, S\_ proportion out of structural cells in image (Fig. 2b). The columns show values for the linear regression on per image proportions as function of GA and remodeling score  $\delta$ : the log transformed ratio of  $R^2$ , the maximal obtained regression  $R^2$  (maximal between GA and  $\delta$ ), the minimal obtained regression p-value and trend size (see Methods). Second tab- Values plotted in Fig. 5a. Each row represents a combination of a cell type and a functional marker. The columns show values for the linear regression on per image marker positivity rates for the marker-cell type as function of GA and remodeling score  $\delta$ : the log transformed ratio of  $R^2$ , the maximal obtained regression  $R^2$  (maximal between GA and  $\delta$ ), the minimal obtained regression p-value and trend size (see Methods).

**Supplementary Table 11 – NanoString DSP counts and meta-data.** First tab- ROI meta-data and raw counts. Meta-data for ROIs. Second tab- mapping Nanostring ROIs to their matching MIBI images. Third tab- raw counts data per ROI. Fourth tab- Differentially expressed genes between interstitial and intravascular EVTs. p-values calculation and multiple hypothesis correction performed by the R Limma package, See methods.

**Supplementary Table 12 – Cell microenvironment lineage composition.** Fraction of cells from each lineage, for each of the 12 cell microenvironments. See Methods.

**Supplementary Table 13 – NanoString DSP analysis of decidua ROIs.** First tab- Synchronized expression of GO-BP pathways. See Methods for details about p-value calculation. Second tab- Decidua ROIs deconvolution results using CIBERSORTx. Third tab- match between deconvolved cell types and MIBI cell types. Fourth tab- Per gene second degree polynomial regression results:  $R^2$ , p-values and fold change of gene expression as function of GA,  $\delta$  and tissue composition.

**Supplementary Table 14 – EVT by compartment LDA analysis.** First tab- Id1 values per single EVT, LDA input- standardized marker expression values, additional metadata such as EVT type, anatomical location, the image the cell was taken from. Second tab- LDA Coefficients per EVT expressed marker.

# Supplementary Methods

## Antibody Validation

### Antibody Panel Single Channel Immune Controls

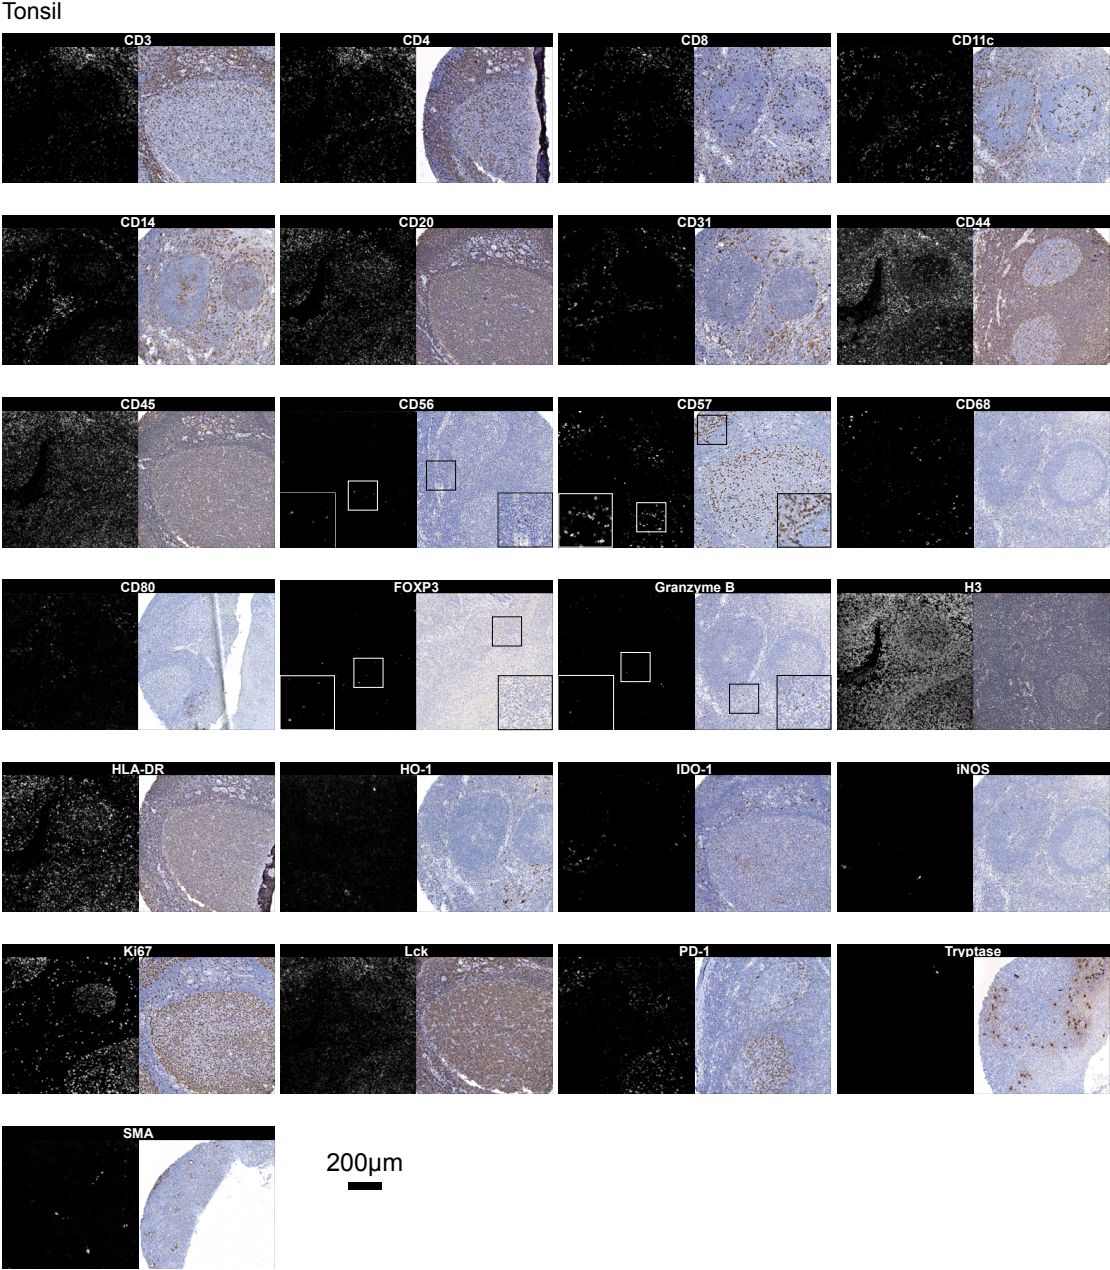

## Placenta/decidua

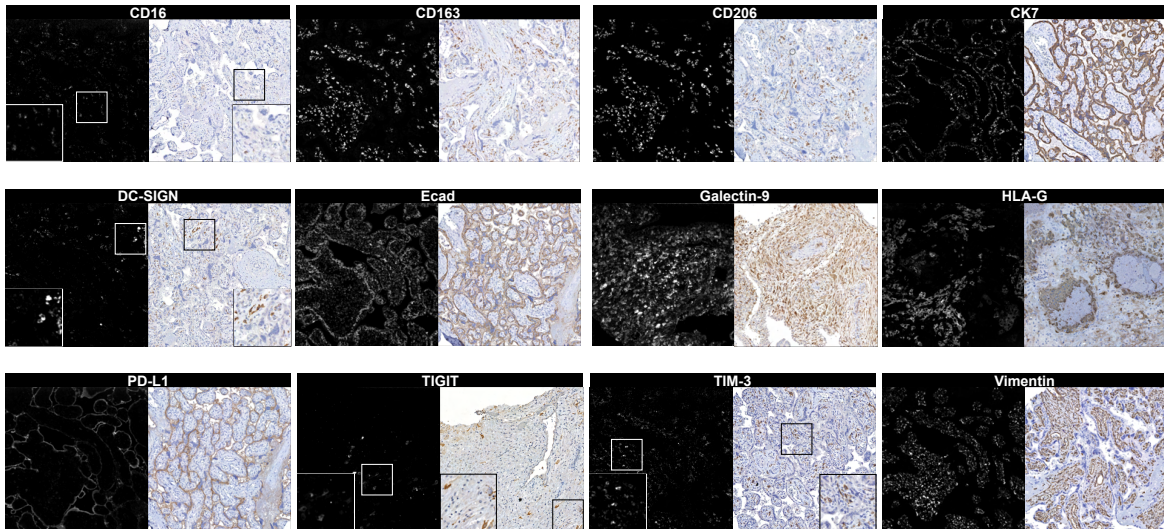

200µm

*Supplementary Information Figure 1 | MIBI-TOF antibody panel. Representative images of MIBI conjugate staining for all markers along with serial single channel immunohistochemistry images, with immune control tissues (tonsil and placenta). Representative images of n=3. Scale bar, 200 µm.*

## Cell Segmentation and Clustering

This section contains a figure panel illustrating the single cell segmentation process in greater detail (Supplementary Information Figure 2a), several figure panels illustrating cell clustering was not biased by sample (Supplementary Information Figure 2b-g) and example MIBI images showcasing cells positive for lineage markers (Supplementary Information Figure 2h).

a

### 1. Train Mesmer CNN

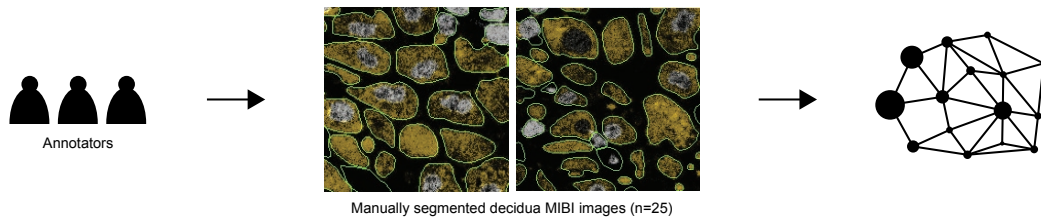

### 2. Run model on cohort

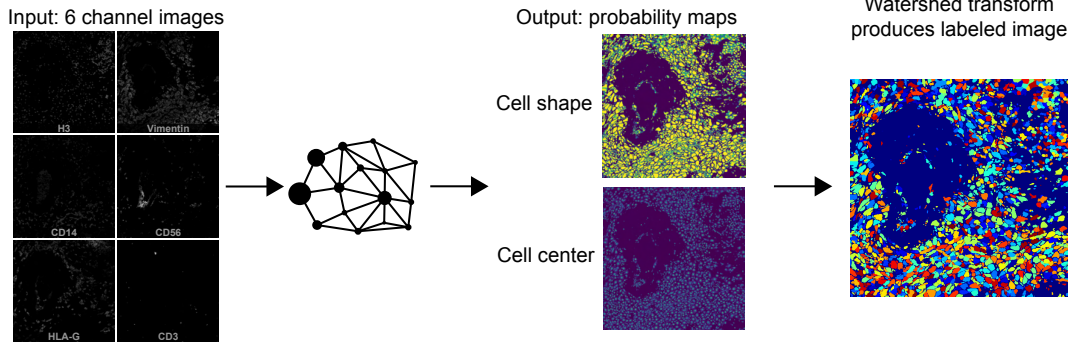

### 3. Post processing of large tissue features

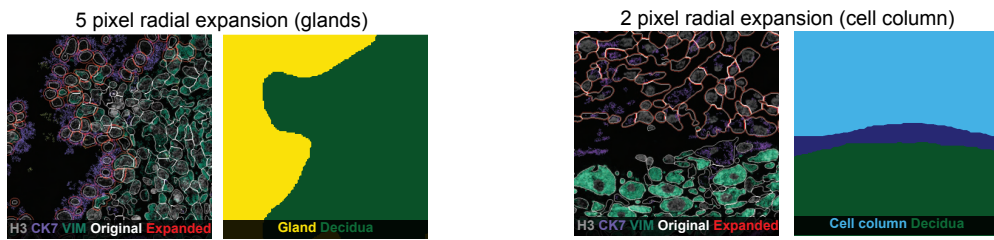

### 4. Final segmentation

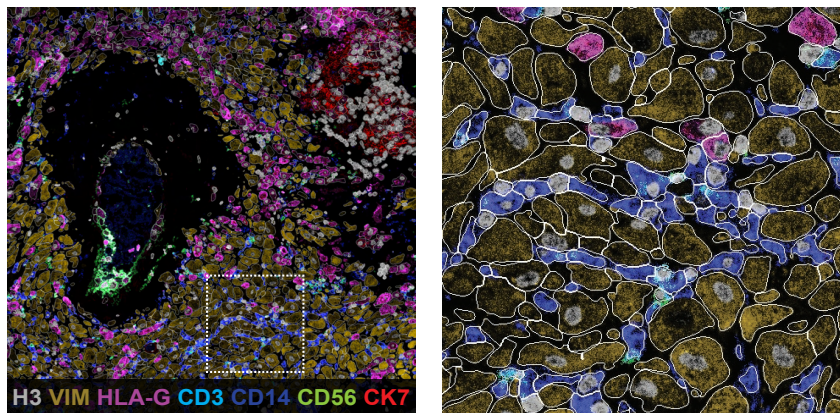



**b**

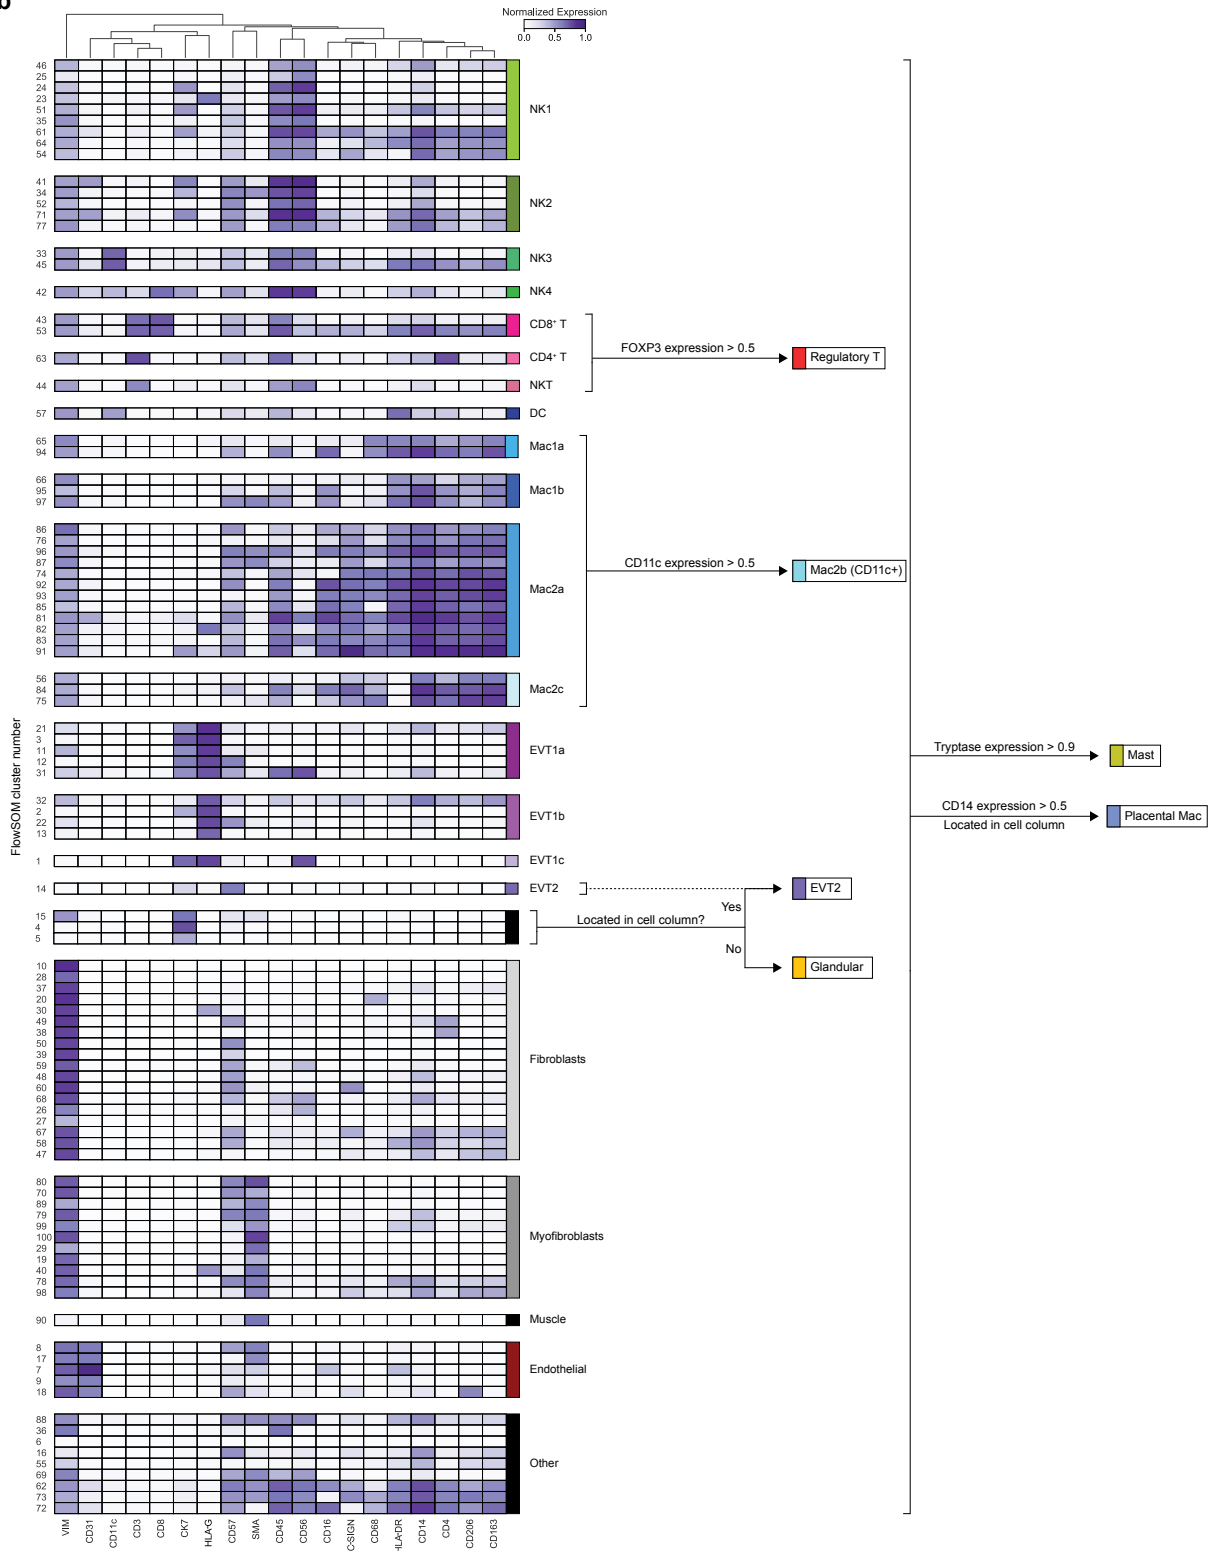

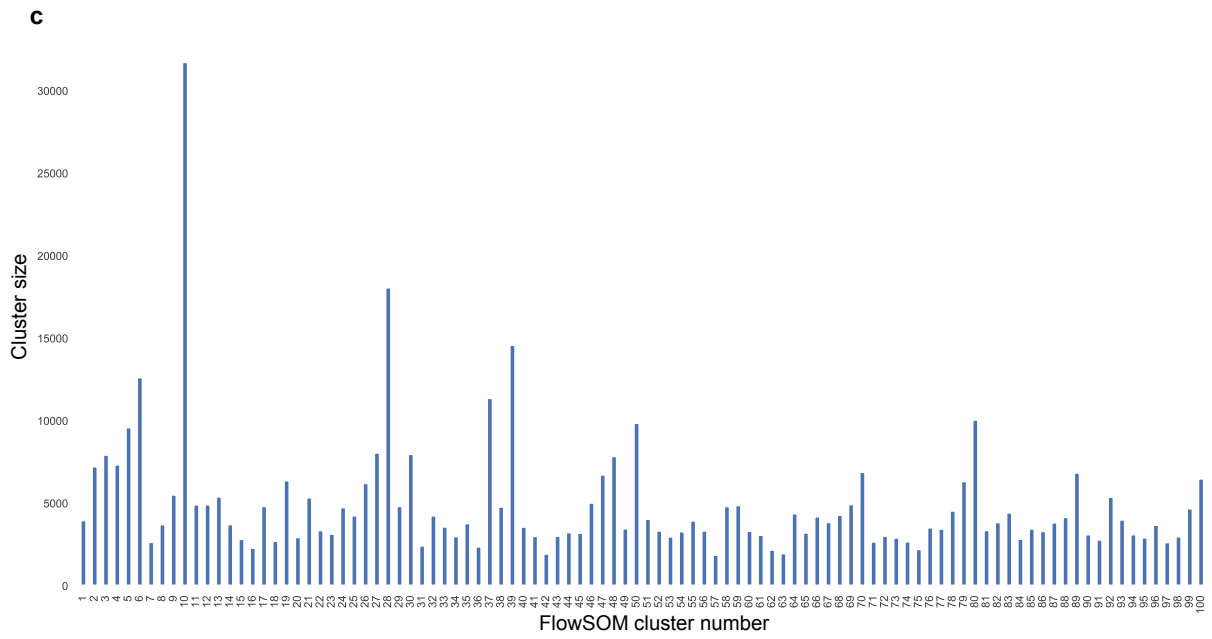

**d**

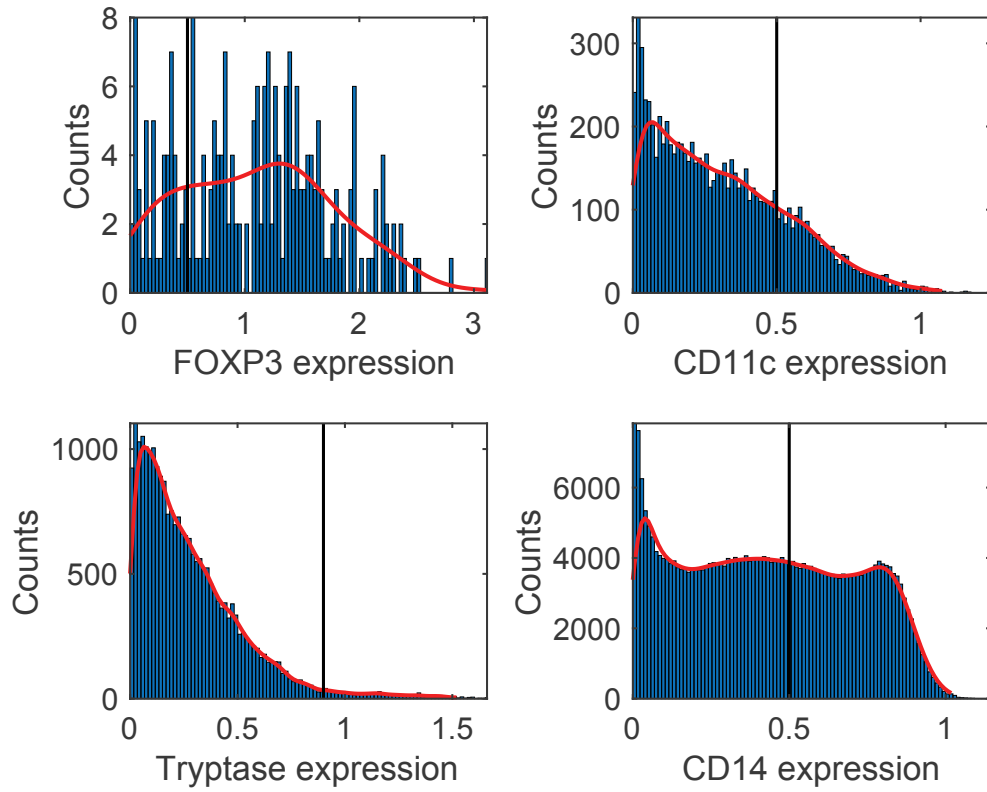

**e**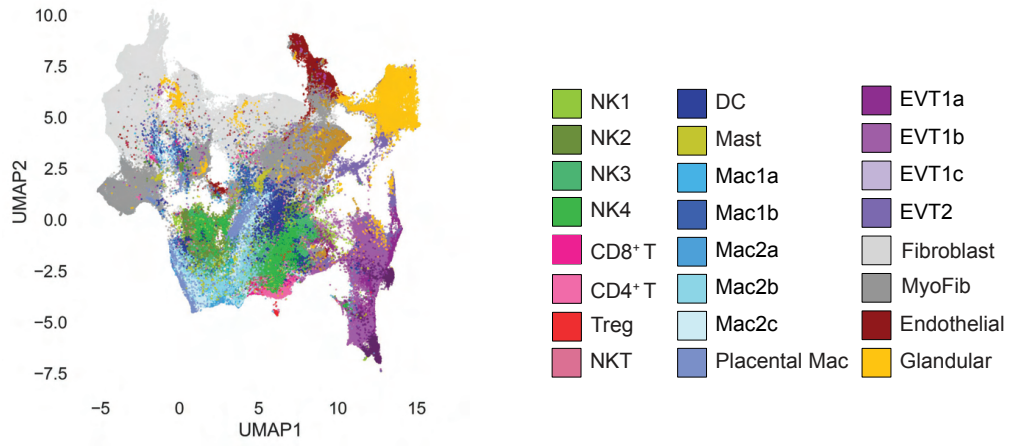**f**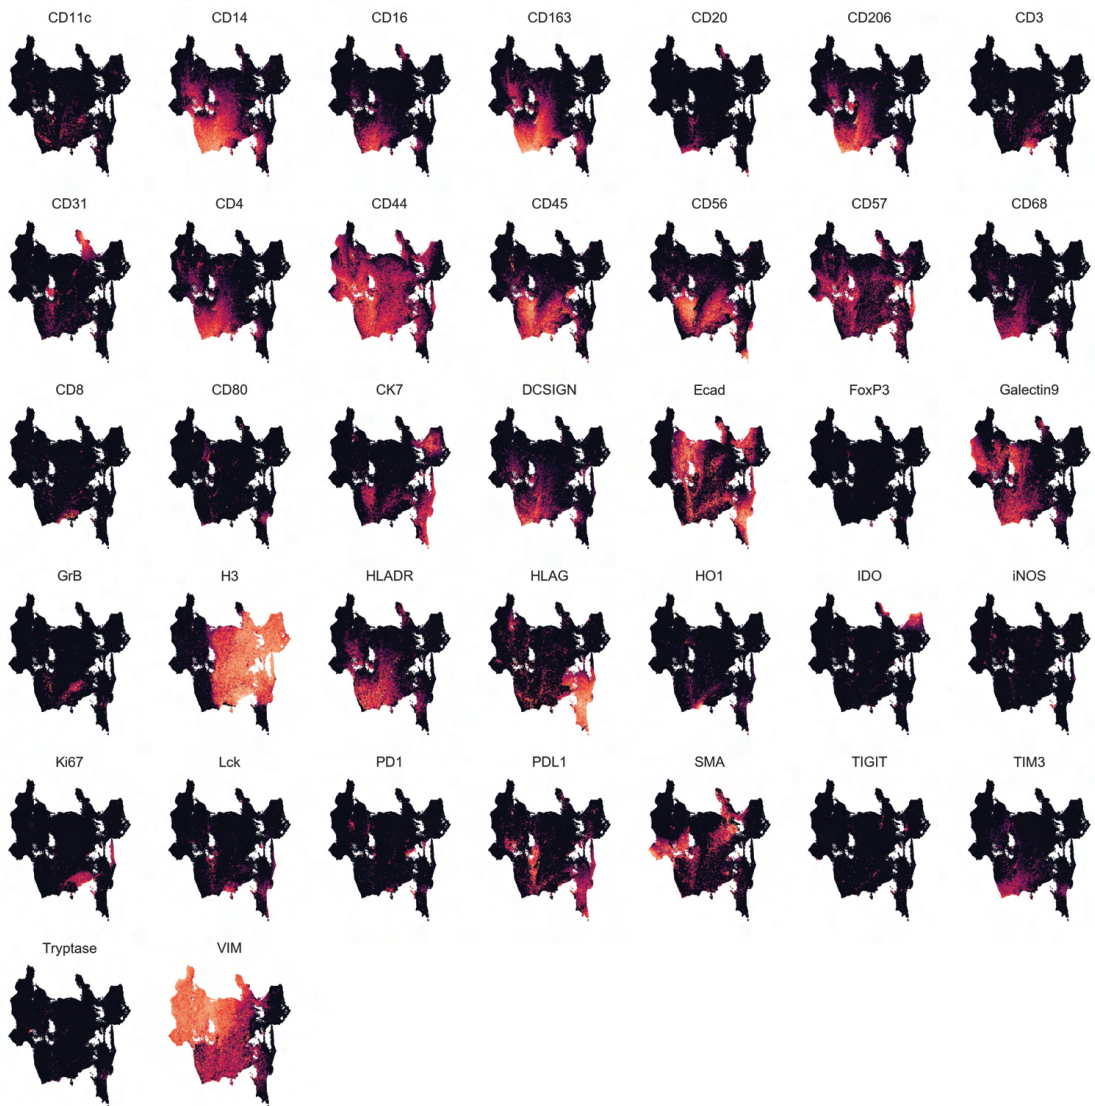

g

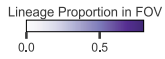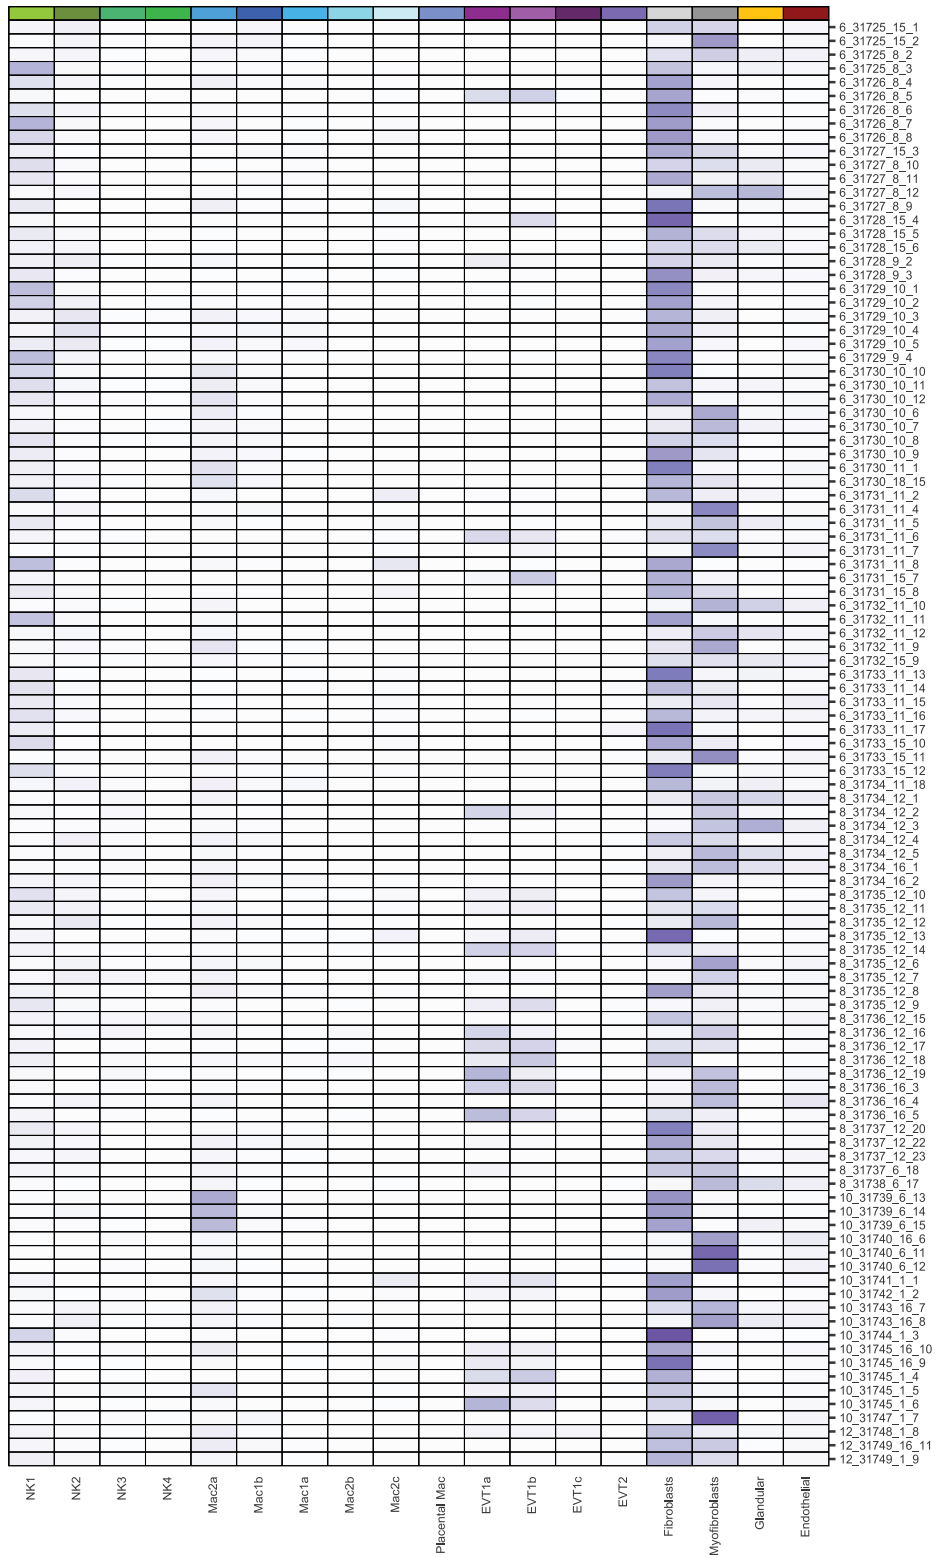

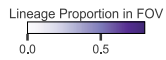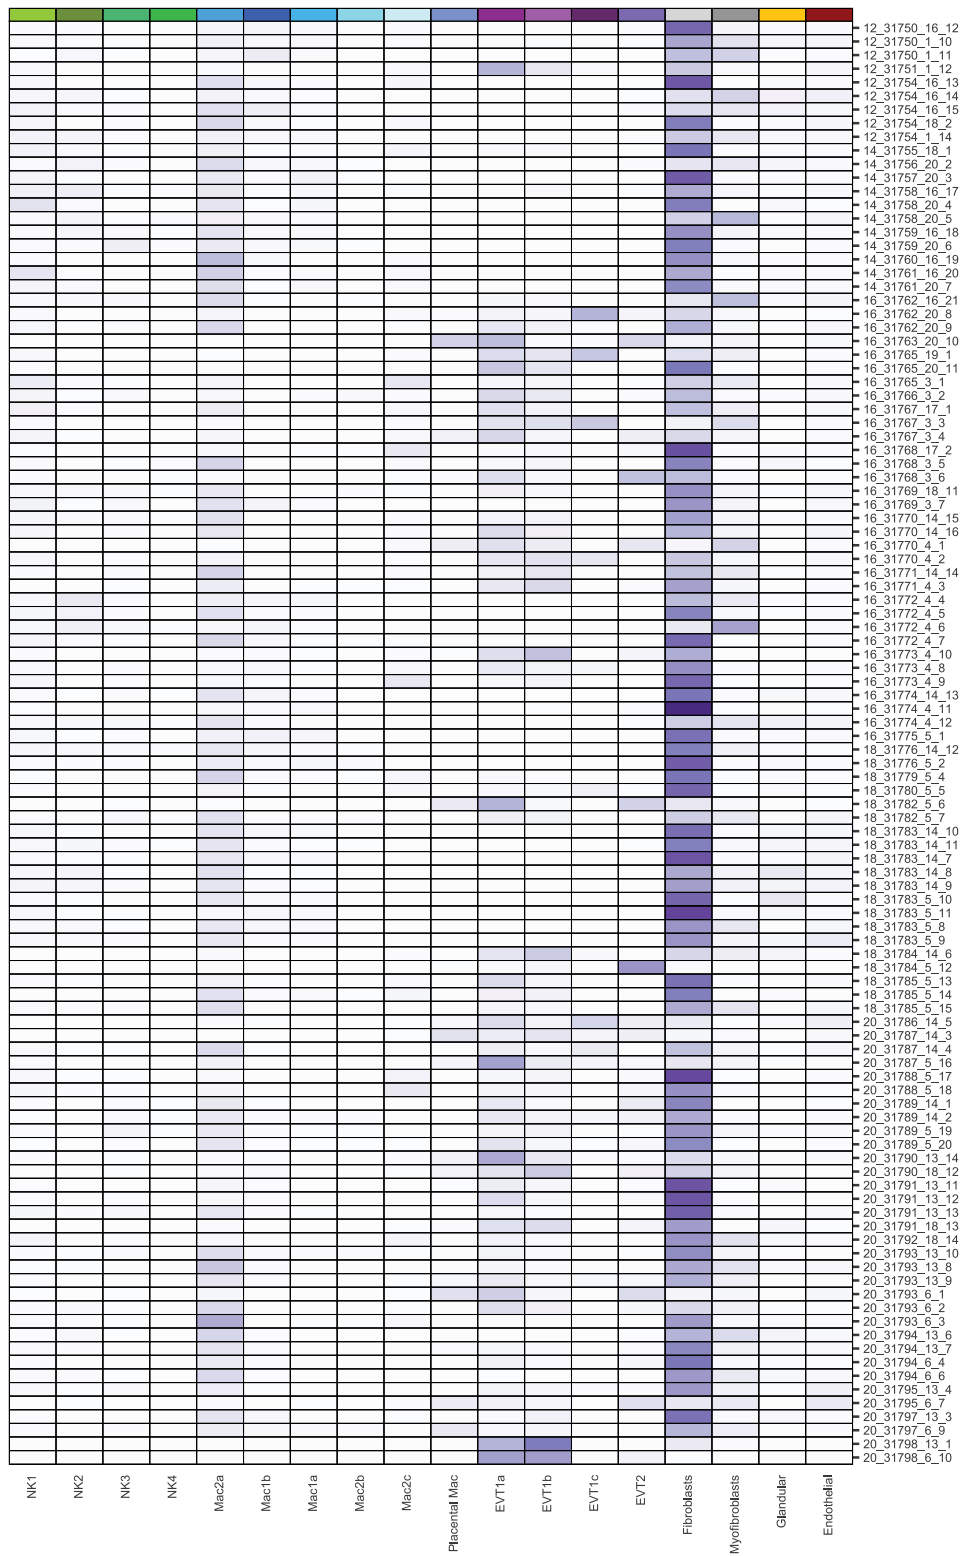

h

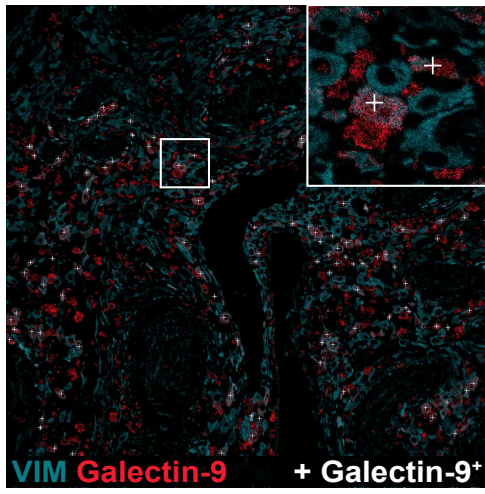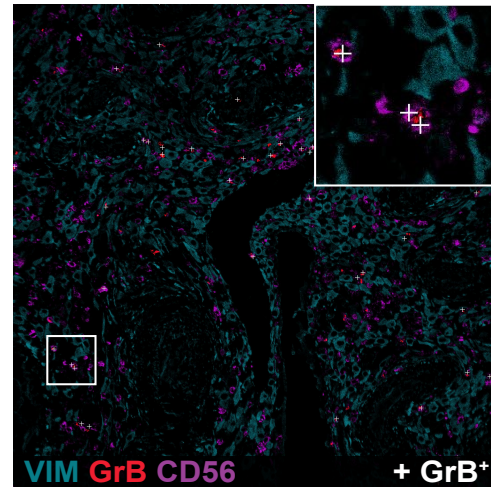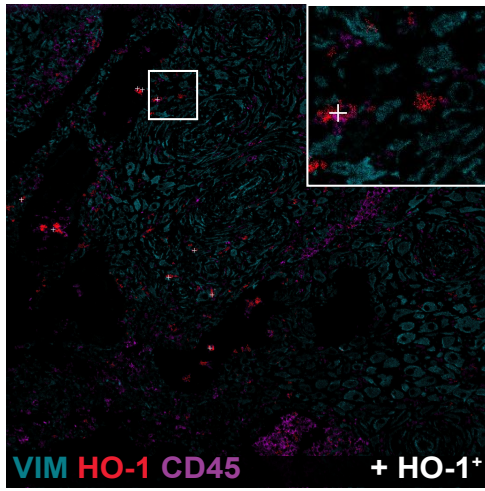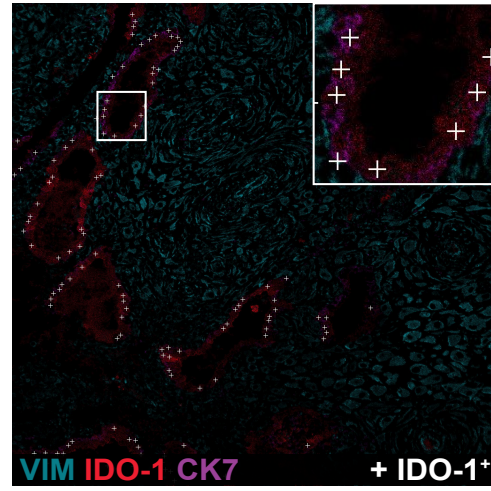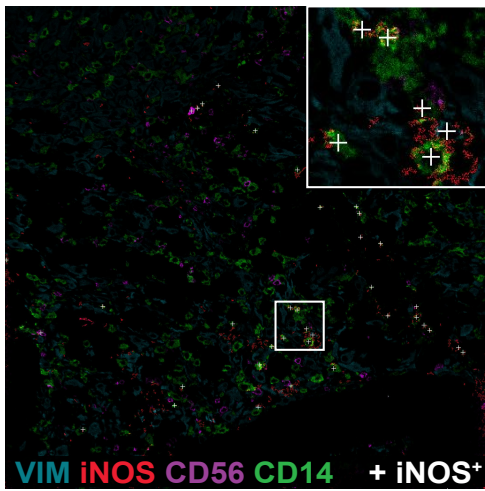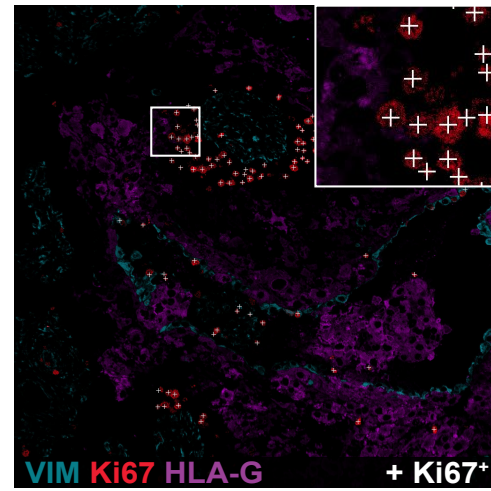

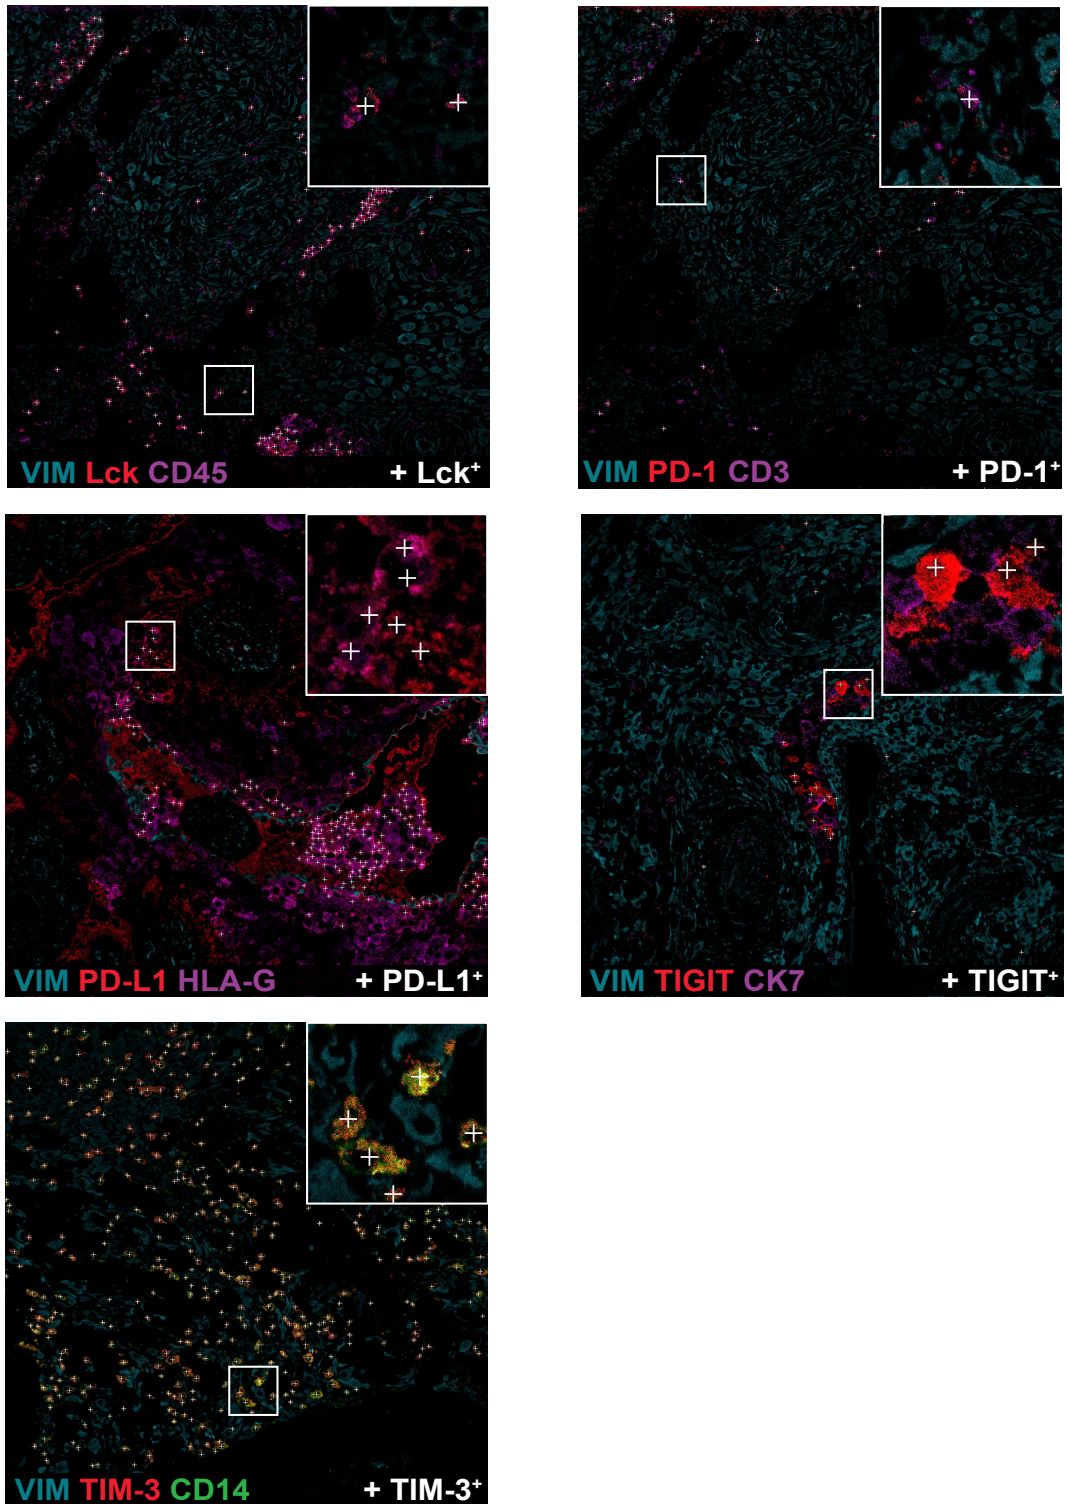

Supplementary Information Figure 2 | Workflow for Mesmer whole-cell segmentation of single cells from MIBI images and cell phenotyping. a. Workflow. (1) Input of manually annotated decidua MIBI images to train our custom convolutional neural network (CNN) Mesmer. (2) Six-channel inputs to Mesmer and outputs (probability maps for cell shape and the center of each cell) with subsequent watershed transformation producing labeled, segmented images.

(3) Post-processing parameters used to more accurately represent marker expression by cell populations located in the glands and anchoring (cell column) villi. VIM, vimentin. (4) Pseudocolored MIBI overlay showing final whole-cell segmentation of a representative MIBI image. b. Overview of steps involved in single-cell phenotyping. (Left to right) Output from FlowSOM (100 clusters) and subsequent assignment to cell phenotypes..c. Number of cells assigned to each FlowSOM cluster d. Histograms of normalized marker expression distributions for FOXP3, CD11c, tryptase, and CD14, with thresholds (vertical line) used for cell phenotyping. e. UMAP of dataset with cell phenotype assignments overlaid. f. UMAPs of dataset with marker expression overlaid. g. Heatmap showing proportion of cells belonging to each assigned lineage in each FOV. h. Representative MIBI overlays showing positive functional marker expression. White crosses indicate cells positive for each functional marker according to the set binary threshold. Representative image of n=3 FOVs per marker.

## Analysis of NanoString Whole Transcriptome Data for Decidua ROIs

For this analysis on decidua samples, only genes with background subtracted, normalized counts  $\geq 10$  in at least two decidua samples were considered. This resulted in 13104 expressed genes (see Methods “Normalization and scaling of GeoMx counts data”).

To estimate the contribution of cell type frequencies in decidua samples to the observed changes in gene expression, cell-type abundancies were estimated in decidua ROIs using the online version of the deconvolution algorithm CIBERSORTx. A custom signature matrix was created using the droplet-based 10x single-cell transcriptome profiles from 30 maternal-fetal tissue samples from Vento-Tormo et al (dataset: <https://www.ebi.ac.uk/biostudies/arrayexpress/studies/E-MTAB-6701#>). Only cell annotations originating from decidua and placenta were used in creating the signature matrix. This signature matrix was used to impute cell fractions on the Nanostring decidua ROIs (Supplementary Table 13).

We then compared the cell type frequencies imputed by CIBERSORTx to the cell type frequencies we measured by MIBI in the decidua masks of the matched MIBI images. We limited this analysis to cell types that are abundant enough in decidua based on our MIBI measurements (frequency  $\geq 1\%$ ). In order to match cell type annotations between the two different data sets, we grouped the cell types from the Vento-Tormo et al. (Nature, 2018) dataset and matched them with MIBI as specified in Supplementary Table 13.

We then leveraged the deconvolved cell frequencies to predict which genes are trending with gestational age in decidual samples and which trends are better described by tissue composition or SAR. To do that, for each gene, we performed the following analysis:

1. Perform separate polynomial regressions (same as analysis described for artery samples in Methods) of gene expression as a function of gestational age, SAR and each of the six cell type frequencies described in Supplementary Table 13
2. Considering only regression models with p-values  $\leq 0.05$  and fold change  $\geq 2$ , rank models by their  $R^2$
3. Classify the gene as trending with gestational age, SAR or with one of the cell frequencies based on the model with maximal  $R^2$
4. If there were no regression models with p-values  $\leq 0.05$  and fold change  $\geq 2$  for the gene, classify it as non-trending

For Coordinated gene expression by pathways in decidua samples we considered all genes for which GA trend was significantly better than SAR trend regardless of tissue composition trends (Supplementary Information Figure 3). Analysis was performed the



same way as described for arteries in Methods section “Coordinated gene expression by pathways in artery”.

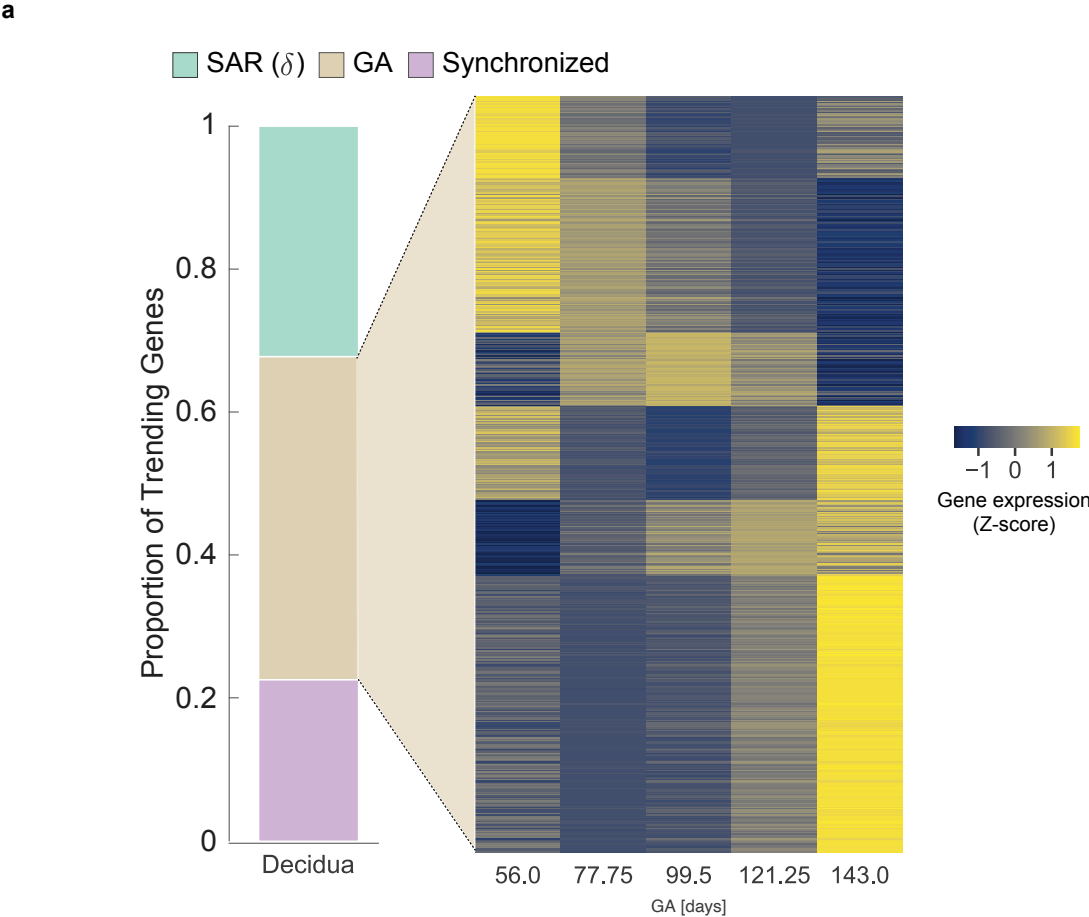

**Supplementary Information Figure 3 | Decidual ROIs Nanostring data analysis. a.** Proportion of genes in decidua (1722 total) tissue where expression changes significantly correlate with GA (778), SAR ( $\delta$ ) (555), or both (389). Heatmap inset: GA-correlated genes in decidua showing mean normalized expression (Z-score) by binned GA. Genes shown are only those most correlated with GA after comparing each gene against GA and SAR.

Tim-3 and Galectin-9 Co-expression in single cells

Tim-3 and Galectin-9 coordinated up-regulation was observed within single cells for decidual macrophages (Supplementary Information Figure 4).

a

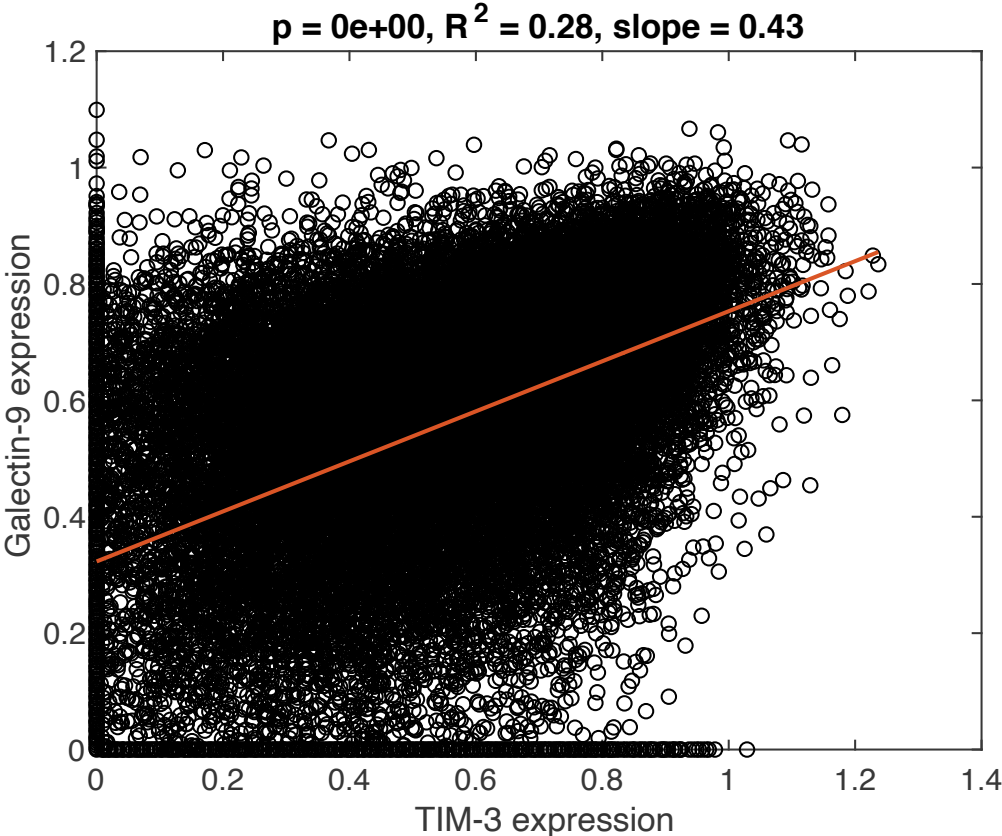

**Supplementary Information Figure 4 | Single-cell expression of immunoregulatory markers. a.** Source data: Scatter plot of the expression of TIM-3 and galectin-9 in individual Mac2a and Mac2b cells from all images. Red line indicates fitted linear regression model.
